# Supplementary material
Source: publisher figshare collection journal article supplement (https://tandf.figshare.com/articles/dataset/_/8188433)
Supplement: Supplementary file 1 [file 1]

Archive with 2 entries (2 files):
- iija_a_1514538_sm4408.pdf
- iija_a_1514538_sm4407.docx
