# Supplementary material
Source: publisher figshare collection journal article supplement (https://tandf.figshare.com/articles/dataset/_/8188433)
Supplement: Supplementary file 1 [file 1 › iija_a_1514538_sm4407.docx]

**Supplementary Appendix 2. Semi-structured interview guide**

| 1. What did you expect from the intervention before it started? |
| --- |
| 1. What affected your motivation to undertake the intervention? |
| 1. What were your experiences of the-intervention? |
| 1. In what way did the intervention affect you? |
| 1. Has the intervention changed the way you view your tinnitus? |
| 1. Has the intervention helped with anything besides tinnitus? |
| 1. While you were doing the intervention, what made you continue or not continue doing it? |
| 1. What are your thoughts about having treatment via the Internet? |
| 1. Which aspects of the treatment were beneficial or helpful? |
| 1. Which aspects of the treatment were least helpful or difficult? |
